# Supplementary material for: Rapid Spread and Genetic Characterisation of a Recently Emerged Recombinant Lumpy Skin Disease Virus in Thailand
Source: MDPI journal article supplement (doi:10.3390/vetsci9100542), 2022-09-30
Supplement: s1 [file s1]

## Supplemental Materials

**Table S1.** Sequences of oligonucleotide primers used for amplification and detection of LSDV genes.

| Target genes | Primer/probe names    | Sequences from 5' to 3'             | References |
|--------------|-----------------------|-------------------------------------|------------|
| <i>p32</i>   | CaPV-074F1            | AAA ACG GTA TAT GGA ATA GAG TTG GAA | [28]       |
|              | CaPV-074R1            | AAA TGA AAC CAA TGG ATG GGA TA      |            |
|              | CaPV-074P1            | FAM-TGG CTC ATA GAT TTC CT-MGBNFQ   |            |
| <i>RPO30</i> | Cp <i>RPO30</i> -OL1F | CAG CTG TTT GTT TAC ATT TGA TTT TT  | [33]       |
|              | Cp <i>RPO30</i> -OL1R | TCG TAT AGA AAC AAG CCT TTA ATA GA  |            |
|              | Cp <i>RPO30</i> -OL2F | TTT GAA CAC ATT TTA TTC CAA AAA G   |            |
|              | Cp <i>RPO30</i> -OL2R | AAC CTA CAT GCA TAA ACA GAA GC      |            |
| <i>GPCR</i>  | Cp <i>GPCR</i> -OL1F  | TGAAAAATTAATCCATTCTTCTAAACA         | [33]       |
|              | Cp <i>GPCR</i> -OL1R  | TCATGTATTTTATAACGATAATGCAAA         |            |
|              | Cp <i>GPCR</i> -OL2F  | TTAGCGGTATAATCATTCCAAATA            |            |
|              | Cp <i>GPCR</i> -OL2R  | GCGATGATTATGATGATTATGAAGTG          |            |
|              | Cp <i>GPCR</i> -OL3F  | CACAATTATATTTCCAAATAATCCAA          |            |
|              | Cp <i>GPCR</i> -OL3R  | TGTACATGTGTAATTTTAATGTTTCGTA        |            |

**Table S2.** LSDV and CaPV reference sequences used in the analysis.

| No. | GenBank ID | Virus | Name                      | Identity to Thailand (OM033705) | Identity to vaccine (KX764643) | Identity to Wildtype (AF325528) |
|-----|------------|-------|---------------------------|---------------------------------|--------------------------------|---------------------------------|
| 1*  | AF325528   | LSDV  | Neethling-2490            | 99.24                           | 98.79                          |                                 |
| 2*  | KX683219   | LSDV  | KSGP0240                  | 99.24                           | 98.79                          | 100                             |
| 3*  | MN072619   | LSDV  | Kenya                     | 99.24                           | 98.93                          | 100                             |
| 4*  | AF409137   | LSDV  | Neethling Warmbaths       | 99.17                           | 98.73                          | 99.84                           |
| 5   | MW656253   | LSDV  | 280-KZN-RSA               | 99.19                           | 98.9                           | 99.87                           |
| 6   | MN642592   | LSDV  | Kubash-KAZ                | 99.17                           | 98.82                          | 99.87                           |
| 7   | MN995838   | LSDV  | pendik                    | 99.15                           | 98.72                          | 99.82                           |
| 8   | MT643825   | LSDV  | 210LSD-249/BUL            | 99.17                           | 98.77                          | 99.86                           |
| 9   | MT130502   | LSDV  | Neethling-RIBSP           | 97.62                           | 96.49                          | 98.31                           |
| 10* | MH893760   | LSDV  | Russia/Dagestan           | 99.18                           | 98.76                          | 99.87                           |
| 11* | AF409138   | LSDV  | Neethling vaccine LW 1959 | 99.41                           | 100                            | 98.79                           |
| 12* | KX764643   | LSDV  | Neethling-SIS-Lumpyvax    | 99.41                           |                                | 98.79                           |
| 13* | MG972412   | LSDV  | Cro2016                   | 99.41                           | 100                            | 98.79                           |
| 14* | KX764644   | LSDV  | Neethling-Herbivac        | 99.41                           | 100                            | 98.79                           |
| 15* | KX764645   | LSDV  | Neethling-OBP             | 99.42                           | 99.97                          | 98.8                            |
| 16* | MW656252   | LSDV  | Haden/RSA                 | 99.3                            | 99.88                          | 98.68                           |
| 17  | MN636843   | LSDV  | 148-GP-RSA-1997           | 99.43                           | 99.95                          | 98.82                           |
| 18  | MW435866   | LSDV  | SA-Neethling              | 99.5                            | 99.83                          | 98.89                           |
| 19* | MH646674   | LSDV  | Russia/Saratov/2017       | 99.4                            | 99.48                          | 99.11                           |
| 20* | MW355944   | LSDV  | China/GD01/2020           | 99.99                           | 99.41                          | 99.23                           |
| 21* | MZ577076   | LSDV  | 20L81/Bang-Thanh/VNM-2020 | 100                             | 99.41                          | 99.24                           |
| 22  | OM033705   | LSDV  | Thailand/Yasothon/2021    |                                 | 99.41                          | 99.24                           |
| 23* | MW732649   | LSDV  | HongKong/2020             | 99.82                           | 99.36                          | 99.17                           |
| 24* | MT134042   | LSDV  | Russia/Udmurtiya/2019     | 99.4                            | 99.31                          | 99.4                            |

|    |          |          |                 |       |       |       |
|----|----------|----------|-----------------|-------|-------|-------|
| 25 | MN072621 | Goatpox  | Vietnam         | 90.44 | 90.6  | 90.66 |
| 26 | MN072622 | Goatpox  | Turkey          | 97.95 | 97.88 | 98.09 |
| 27 | MN072623 | Goatpox  | Oman            | 85.43 | 85.36 | 85.54 |
| 28 | AY077834 | Sheeppox | NISKHI          | 85.08 | 84.99 | 85.19 |
| 29 | MN072630 | Sheeppox | Saudi Arabia    | 85.08 | 84.99 | 85.19 |
| 30 | MN072631 | Sheeppox | Turkey          | 85.09 | 85    | 85.19 |
| 31 | MG000156 | Sheeppox | Jaipur          | 97.82 | 97.72 | 97.95 |
| 32 | MN072629 | Sheeppox | Pendik          | 85.08 | 84.99 | 85.2  |
| 33 | MN072628 | Sheeppox | Nigeria         | 85.09 | 84.99 | 85.2  |
| 34 | MG000157 | Sheeppox | Romanian Fenner | 97.8  | 97.71 | 97.94 |
| 35 | MN072626 | Sheeppox | Abu Gharib      | 97.79 | 97.7  | 97.93 |
| 36 | MN072627 | Sheeppox | Saudi Arabia    | 97.8  | 97.71 | 97.94 |

\* Sequences aligned in phylogenetic trees of recombinant analysis.

**Table S3.** The index cases of LSD outbreaks in each province from March 2021 to May 2022.

| No. | Date of clinical sign reported (D/M/Y) | Regions   | Provinces                | Abbreviations |
|-----|----------------------------------------|-----------|--------------------------|---------------|
| 1   | 29/3/2021                              | Northeast | Roi Et                   | RET           |
| 2a  | 30/3/2021                              | Northeast | Ubon Ratchathani         | UBN           |
| 2b  | 30/3/2021                              | Northeast | Surin                    | SRN           |
| 3a  | 31/3/2021                              | Northeast | Kalasin                  | KSN           |
| 3b  | 31/3/2021                              | Northeast | Nakhon Phanom            | NPM           |
| 4   | 1/4/2021                               | Northeast | Buriram                  | BRM           |
| 5a  | 2/4/2021                               | Northeast | Maha Sarakham            | MKM           |
| 5b  | 2/4/2021                               | Northeast | Aumnattharoen            | ACR           |
| 5c  | 2/4/2021                               | Northeast | Khon Kaen                | KKN           |
| 6   | 5/4/2021                               | West      | Ratchaburi               | RBR           |
| 7   | 7/4/2021                               | Northeast | Sisaket                  | SSK           |
| 8   | 9/4/2021                               | Northeast | Yasothon                 | YST           |
| 9   | 14/4/2021                              | West      | Phetchaburi              | PBI           |
| 10  | 15/4/2021                              | West      | Kanchanaburi             | KRI           |
| 11  | 16/4/2021                              | Central   | Nakhon Pathom            | NPT           |
| 12  | 18/4/2021                              | Northeast | Mukdahan                 | MDH           |
| 13a | 22/4/2021                              | West      | Prachuap khiri Khan      | PKN           |
| 13b | 22/4/2021                              | West      | Tak                      | TAK           |
| 14a | 23/4/2021                              | Central   | Suphan Buri              | SPB           |
| 14b | 23/4/2021                              | Northeast | Udon Thani               | UDN           |
| 15  | 27/4/2021                              | Central   | Sukhothai                | STI           |
| 16  | 29/4/2021                              | Central   | Lop Buri                 | LRI           |
| 17a | 30/4/2021                              | Northeast | Nong Khai                | NKI           |
| 17b | 30/4/2021                              | South     | Chumphon                 | CPN           |
| 18a | 1/5/2021                               | North     | Chiang Rai               | CRI           |
| 18b | 1/5/2021                               | Central   | Pathum Thani             | PTE           |
| 18c | 1/5/2021                               | Northeast | Sakon Nakhon             | SNK           |
| 18d | 1/5/2021                               | Central   | Angthong                 | ATG           |
| 19  | 4/5/2021                               | North     | Lampang                  | LPG           |
| 20  | 5/5/2021                               | Northeast | Chaiyaphum               | CPM           |
| 21  | 9/5/2021                               | Central   | Phichit                  | PCT           |
| 22a | 10/5/2021                              | Northeast | Nongbua Lumphoo          | NBP           |
| 22b | 10/5/2021                              | Northeast | Beung Kan                | BKN           |
| 23  | 12/5/2021                              | Central   | Phitsanulok              | PLK           |
| 24a | 13/5/2021                              | Central   | Phra Nakhon Si Ayutthaya | AYA           |
| 24b | 13/5/2021                              | Northeast | Sa Kaew                  | SKW           |
| 24c | 13/5/2021                              | Northeast | Loei                     | LEI           |

|     |            |           |                     |     |
|-----|------------|-----------|---------------------|-----|
| 25a | 17/5/2021  | Central   | Phetchabun          | PNB |
| 25b | 17/5/2021  | North     | Nan                 | NAN |
| 26a | 18/5/2021  | Northeast | Nakhon Ratchasima   | NMA |
| 26b | 18/5/2021  | Central   | Saraburi            | SRI |
| 27a | 19/5/2021  | North     | Phayao              | PYO |
| 27b | 19/5/2021  | Central   | Uthai Thani         | UTI |
| 28  | 20/5/2021  | North     | Phrae               | PRE |
| 29  | 21/5/2021  | East      | Cha Choeng Sao      | CCO |
| 30  | 22/5/2021  | East      | Chon Buri           | CBI |
| 31a | 23/5/2021  | Central   | Samut Prakan        | SPK |
| 31b | 23/5/2021  | East      | Prachin Buri        | PRI |
| 32  | 25/5/2021  | Central   | Sing Buri           | SBR |
| 33  | 27/5/2021  | Central   | Bangkok             | BKK |
| 34  | 28/5/2021  | Central   | Chai Nat            | CNT |
| 35  | 5/6/2021   | North     | Lumphun             | LPN |
| 36  | 9/6/2021   | South     | Yala                | YLA |
| 37a | 16/6/2021  | North     | Chiang Mai          | CMI |
| 37b | 16/6/2021  | East      | Chanthaburi         | CTI |
| 38  | 20/6/2021  | Central   | Nakhon Sawan        | NSN |
| 39  | 21/6/2021  | North     | Uttaradit           | UTT |
| 40  | 24/6/2021  | Central   | Samut Sakhon        | SKN |
| 41  | 26/6/2021  | South     | Song Khla           | SKA |
| 42  | 29/6/2021  | Central   | Samut Songkhram     | SKM |
| 43  | 2/7/2021   | Central   | Kamphaeng Phet      | KPT |
| 44  | 5/7/2021   | South     | Krabi               | KBI |
| 45  | 17/7/2021  | South     | Phatthalung         | PLG |
| 46  | 29/7/2021  | Central   | Nakhon Nayok        | NYK |
| 47  | 17/8/2021  | Central   | Nonthaburi          | NBR |
| 48  | 26/8/2021  | South     | Surat Thani         | STN |
| 49  | 7/9/2021   | East      | Trat                | TRT |
| 50  | 19/10/2021 | South     | Nakhon Si Thammarat | NST |
| 51  | 11/2/2022  | South     | Trang               | TRG |
| 52  | 30/5/2022  | South     | Phuket              | PHK |

**Table S4.** Numbers of provinces with LSDV positive in each region from March 2021 to June 2022.

| Years | Months    | Regions |           |         |      |      |       | Total Provinces |
|-------|-----------|---------|-----------|---------|------|------|-------|-----------------|
|       |           | North   | Northeast | Central | East | West | South |                 |
| 2021  | March     | 0       | 5         | 0       | 0    | 0    | 0     | 5               |
| 2021  | April     | 0       | 9         | 4       | 0    | 5    | 1     | 19              |
| 2021  | May       | 5       | 6         | 12      | 4    | 0    | 0     | 27              |
| 2021  | June      | 4       | 0         | 2       | 1    | 0    | 2     | 9               |
| 2021  | July      | 0       | 0         | 2       | 0    | 0    | 2     | 4               |
| 2021  | August    | 0       | 0         | 1       | 0    | 0    | 1     | 2               |
| 2021  | September | 0       | 0         | 0       | 1    | 0    | 0     | 1               |
| 2021  | October   | 0       | 0         | 0       | 0    | 0    | 1     | 1               |
| 2021  | November  | 0       | 0         | 0       | 0    | 0    | 0     | 0               |
| 2021  | December  | 0       | 0         | 0       | 0    | 0    | 0     | 0               |
| 2022  | January   | 0       | 0         | 0       | 0    | 0    | 0     | 0               |
| 2022  | February  | 0       | 0         | 0       | 0    | 0    | 1     | 0               |
| 2022  | March     | 0       | 0         | 0       | 0    | 0    | 0     | 0               |
| 2022  | April     | 0       | 0         | 0       | 0    | 0    | 0     | 0               |
| 2022  | May       | 0       | 0         | 0       | 0    | 0    | 1     | 1               |
| 2022  | June      | 0       | 0         | 0       | 0    | 0    | 0     | 0               |

|                          |   |    |    |   |   |    |    |
|--------------------------|---|----|----|---|---|----|----|
| Total affected provinces | 9 | 20 | 21 | 6 | 5 | 9  | 70 |
| No. provinces per region | 9 | 20 | 22 | 7 | 5 | 14 | 77 |

**Table S5.** GenBank Accession numbers of five Thai LSDV sequences.

| No. | Isolates                        | Accession Numbers |             |              |
|-----|---------------------------------|-------------------|-------------|--------------|
|     |                                 | <i>RPO30</i>      | <i>GPCR</i> | Whole genome |
| 1   | LSDV/Thailand/Roi Et/2021       | MZ579540          | OM250058    | -            |
| 2   | LSDV/Thailand/Sisaket/2021      | MZ579541          | OM250059    | -            |
| 3   | LSDV/Thailand/Lopburi/2021      | MZ579542          | OM250060    | -            |
| 4   | LSDV/Thailand/Kanchanaburi/2021 | MZ615173          | OK323153    | -            |
| 5   | LSDV/Thailand/Yasothon/2021     | -                 | -           | OM033705     |

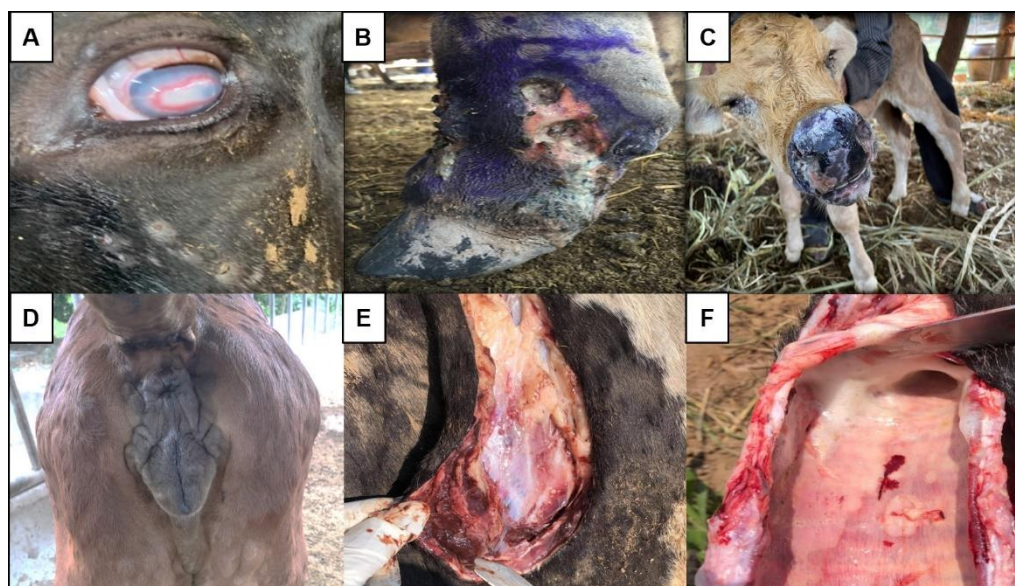**Figure S1.** Some cattle showed conjunctivitis (A) and lameness due to severe skin lesions on phalanges (B), while some calves died from severe clinical signs (C). The lesions also included the nodular reproductive tract (D), inflammatory subscapular lymph nodes (E), and trachea ulcers (F).



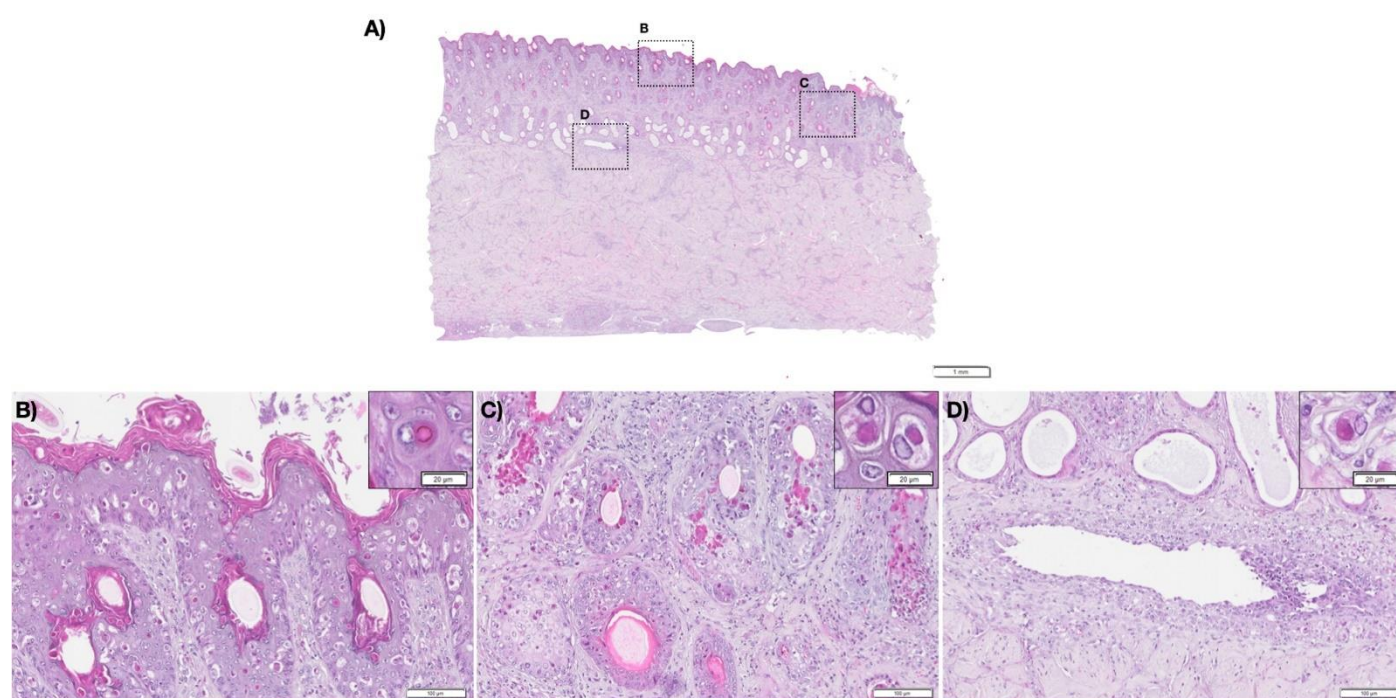

**Figure S2.** The histopathological lesions of LSDV infected skin. At low magnification, the LSD lesions diffusely distributed in the whole top layer of the tissue section comprising epidermis, and deeply into deep dermis and muscle tissue (A). The high magnification views (dashed boxes) depict epidermis (B), hair follicle and sebaceous glands (C), and blood vessels (D). The intracytoplasmic inclusion bodies were a brighten-pink, round to oval shape in cytoplasm of epidermal cells including infiltrating macrophages as shown in the insets.

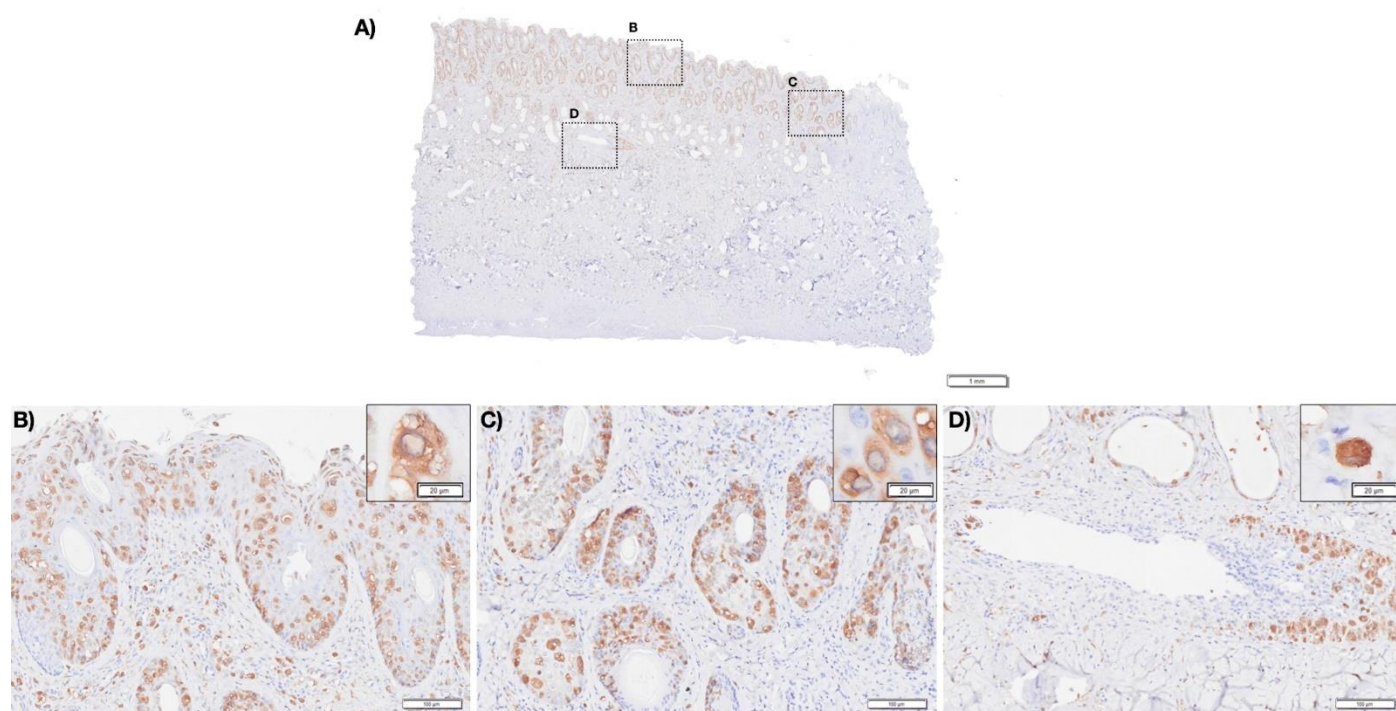

**Figure S3.** Immunohistochemistry of an LSDV infected skin tissue. The brown staining LSDV positive cells abundantly diffused throughout the epidermis and dermis layers of the skin (A) consistent with the histopathological findings in Figure S2. The high magnification dashed boxes (B–D) are

corresponding areas in the consecutive tissue section shown in the Figure S2. The LSDV antigens accumulated in cytoplasm of the infected cells as shown in the insets.

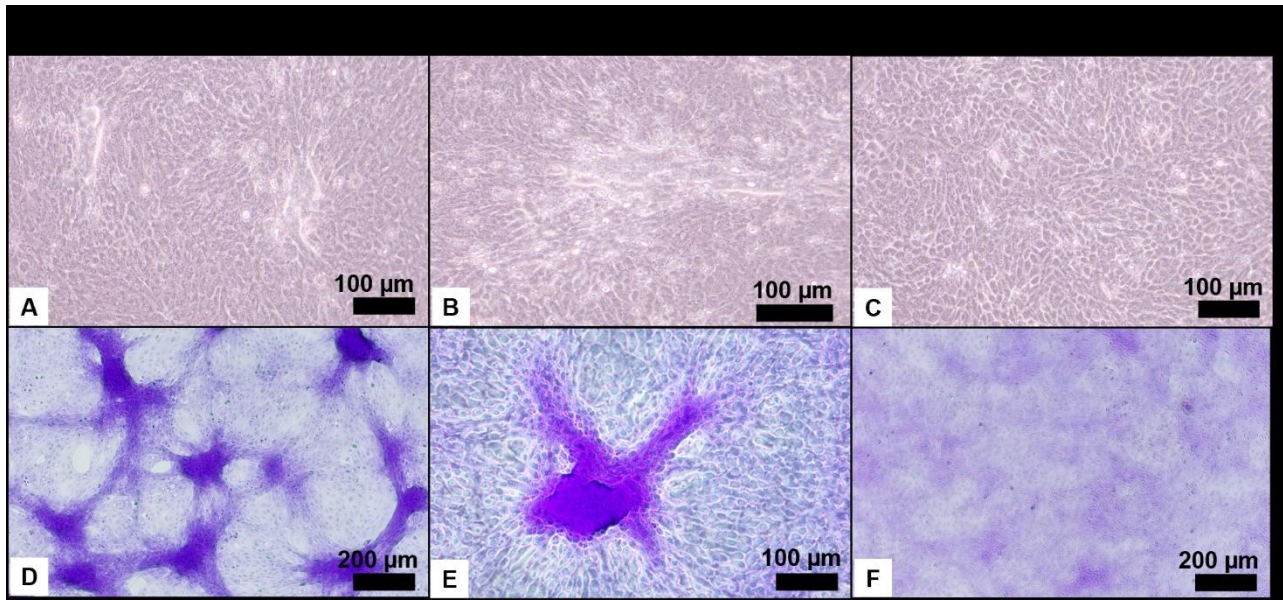

**Figure S4.** Virus isolation from a skin nodule obtained from cattle with *p32* PCR positive. (A-B) The CPE was developed at 3 dpi in MDBK cells of the third passage. (C) MDBK cell culture control without CPE. (D-E) The CPE was clearly demonstrated by crystal violet staining. (F) No CPE was observed in MDBK cell control.



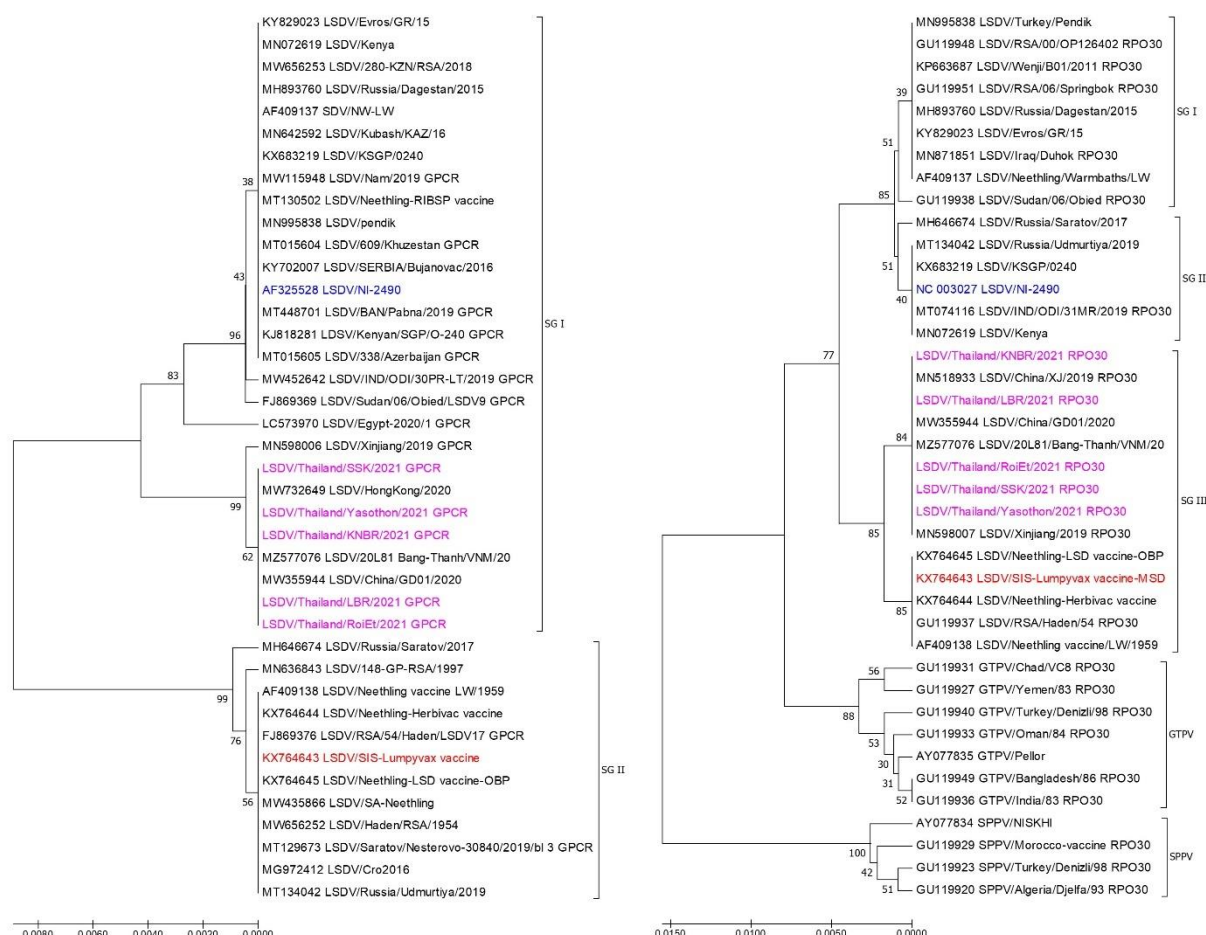

**Figure S5.** Phylogenetic tree based on complete *GPCR* gene (A) and *RPO30* gene (B) of Thai LSDV sequences compared with 35 reference strains of CaPV. The trees were analyzed by UPGMA method with 1,000 bootstraps. The evolutionary distances were computed using the Tamura 3-parameter model. Evolutionary analyses were conducted in MEGA 7. *GPCR* sequences of Thai LSDV isolates (pink) were in subgroup I with LSDV/NI-2490 (blue), while SIS-Lumpyvax vaccine was in subgroup II (red). *RPO30* sequences of Thai LSDV isolates were in subgroup III with SIS-Lumpyvax vaccine, while LSDV/NI-2490 strain was in subgroup II.

**Video S1.** Distribution of LSD outbreaks in Thailand from March to July 2021.
